# Supplementary material
Source: Springer Nature journal article supplement (https://springermedizin.de/resource/supplementary/13063_2011_922_MOESM3_ESM.pdf/9618656)

**I. Raw  
Distribution  
of  
SHG  
Members**

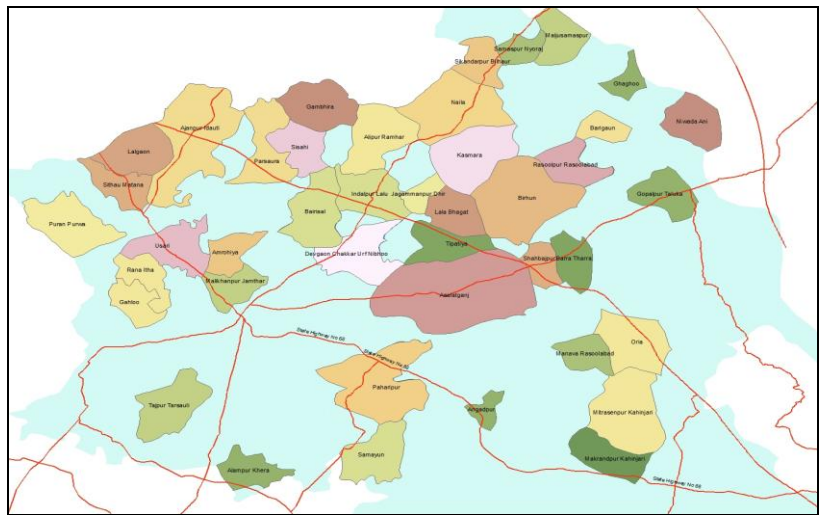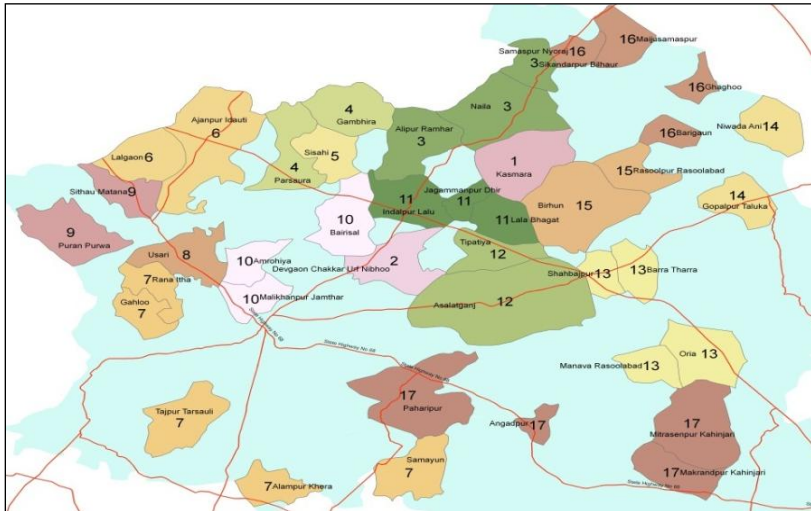

**2. Clusters  
for  
Random  
Assignment**

**3. Treatment  
and  
Control  
Clusters,  
Wave I**

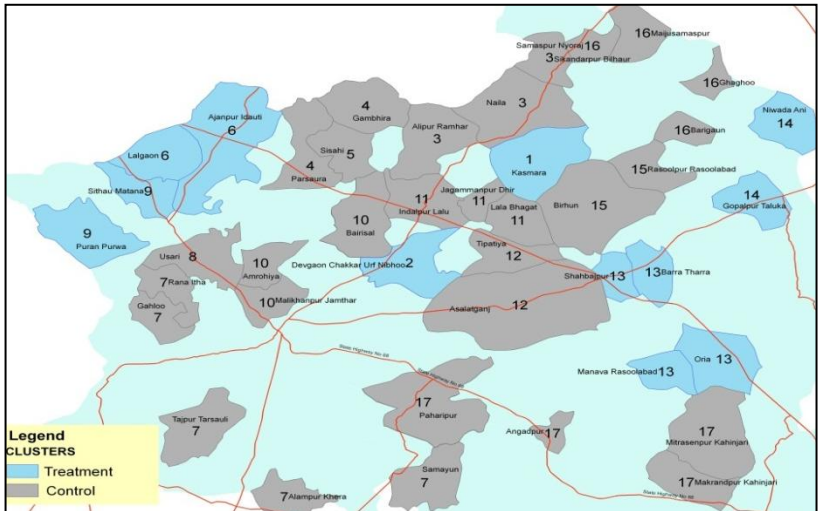

Supplement: MOESM3 [file 9618656]
